# Supplementary material for: Characterizing the Pathogenic, Genomic, and Chemical Traits of Aspergillus fischeri, a Close Relative of the Major Human Fungal Pathogen Aspergillus fumigatus
Source: PubMed Central journal article supplement (PMC6382966; doi:10.1128/msphere.00018-19), 2019-02-20

# Figure S3

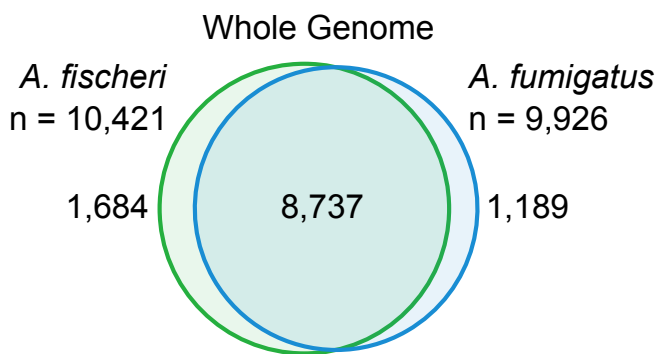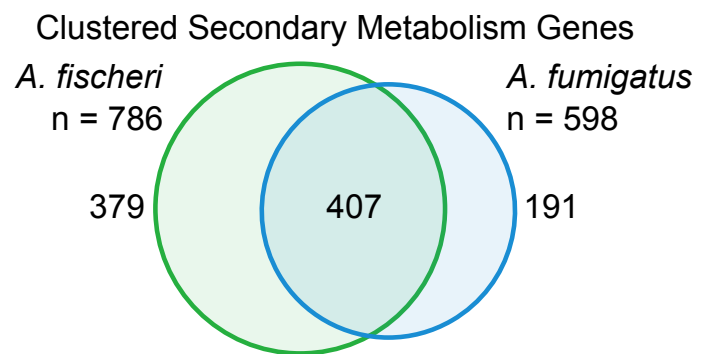

Supplement: mSphere.00018-19-sf003.pdf [file mSphere.00018-19-sf003.pdf]
