# Supplementary material for: Characterizing the Pathogenic, Genomic, and Chemical Traits of Aspergillus fischeri, a Close Relative of the Major Human Fungal Pathogen Aspergillus fumigatus
Source: PubMed Central journal article supplement (PMC6382966; doi:10.1128/msphere.00018-19), 2019-02-20
Supplement: mSphere.00018-19-sf006.pdf [file mSphere.00018-19-sf006.pdf]

# Figure S6

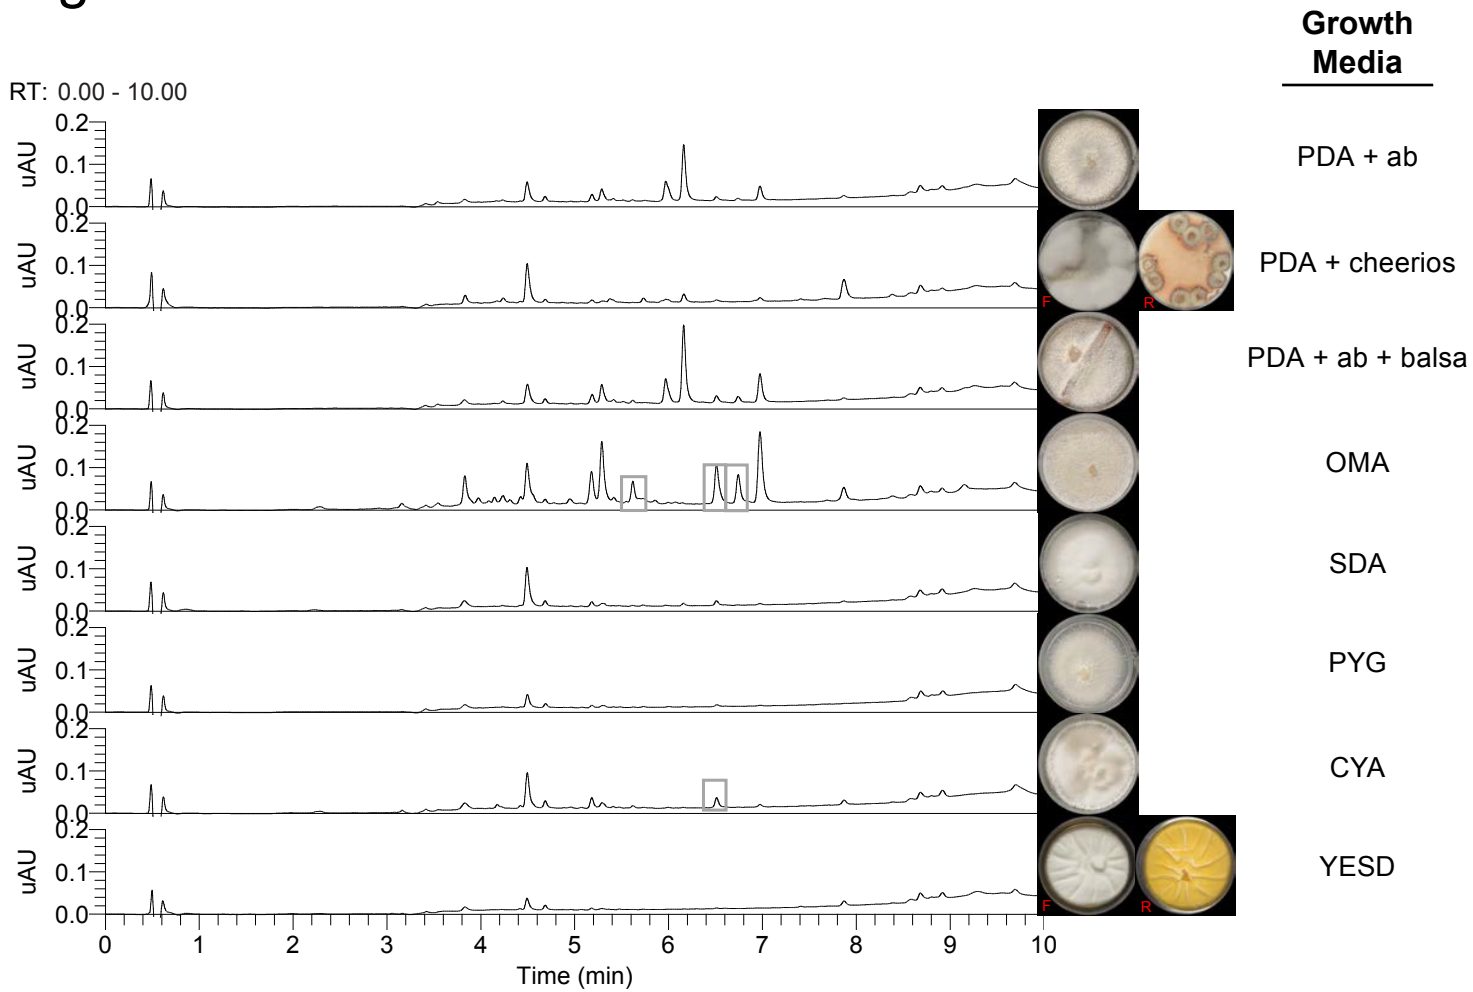

☐ = Difference compared to PDA
